# Supplementary material for: An electricity-fluorescence double-checking biosensor based on graphene for detection of binding kinetics of DNA hybridization
Source: Royal Society of Chemistry journal article supplement (doi:10.1039/c7ra08246k), 2017-01-01
Supplement: c7ra08246k1.pdf [file c7ra08246k1.pdf]

## Supplementary Information

### An Electricity-Fluorescence Double-Checking Biosensor Based on Graphene for Detection of Binding Kinetics of DNA Hybridization

Weiwei Yue, Caiyan Tang, Chunxing Wang, Chengjie Bai, Shuyi Liu, Xiaohui Xie, Hongling Hua, Zhen Zhang and Dengwang Li\*

Shandong Province Key Laboratory of Medical Physics and Image Processing Technology, School of Physics and Electronics, Shandong Normal University, Jinan 250358, P.R. China

Institute of Materials and Clean Energy, Shandong Normal University, Jinan 250358, P.R. China.

School of Physics and Electronics, Shandong Normal University, Jinan 250014, P.R. China

\*Corresponding Email: dengwang@sdu.edu.cn

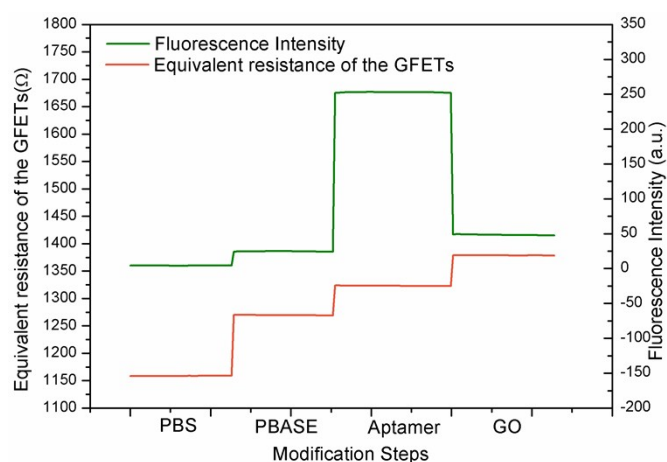

**Fig. S1.** The change of fluorescence and equivalent resistance of graphene FETs with modification by PBASE, probe Aptamer and GO.

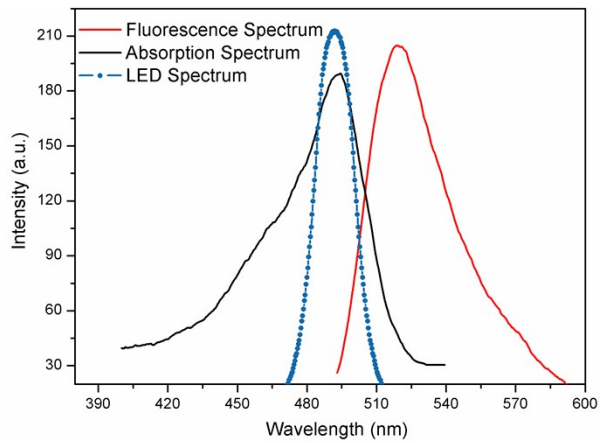

**Fig. S2.** Absorption and emission spectra of the FAM and emission spectra of a LED.

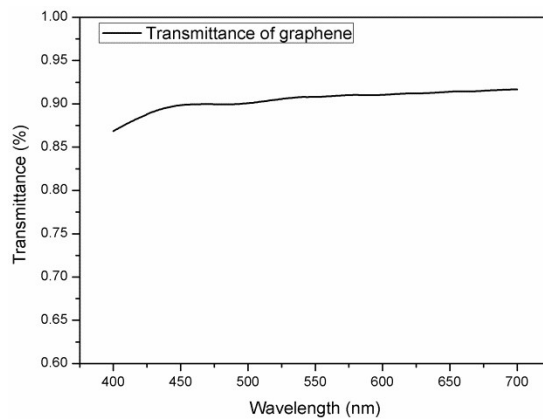

**Fig. S3.** Relationship between wavelength and transmittance of graphene film.

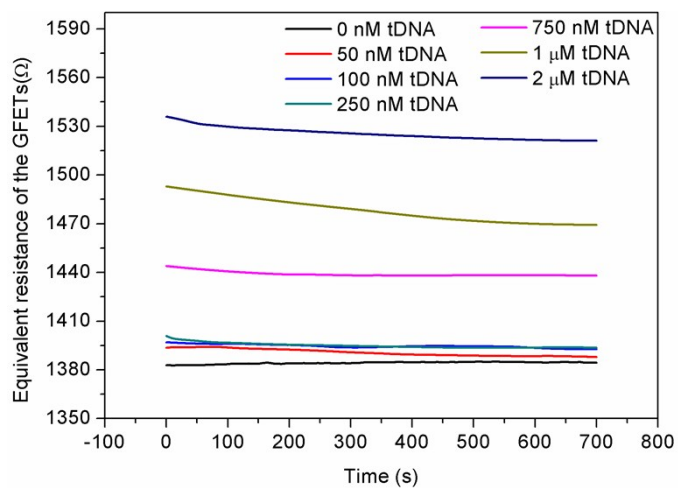

**Fig. S4.** Real-time resistance of the GFETs with different concentrations of tDNA.
